# Supplementary material
Source: ML conference proceedings conference paper supplement (https://proceedings.mlr.press/v115/xu20b.html)
Supplement: Supplementary file 1 [file xu20b-supp.pdf]

# Supplement for “Learning with Non-Convex Truncated Losses by SGD”

## A Properties of truncation functions

In this section, we first verify that three examples of truncation functions satisfy Definition 1.

**Example 1.**  $\phi_\alpha^{(1)}(x) = \alpha \log(1 + \frac{x}{\alpha})$ . We have  $\phi_\alpha^{\prime(1)}(x) = \frac{1}{1+x/\alpha}$ . Then it is easy to check it satisfies condition (ii), (iii), and for any  $\alpha_1 \leq \alpha_2$ , we have  $\phi_{\alpha_1}'(x) \leq \phi_{\alpha_2}'(x)$ . Since  $\phi_\alpha^{\prime\prime(1)}(x) = -\frac{1/\alpha}{(1+x/\alpha)^2}$ , then  $|\phi_\alpha^{\prime\prime(1)}(x)| \leq 1/\alpha$ , indicating that it satisfies condition (i).

**Example 2.**  $\phi_\alpha^{(2)}(x) = \alpha \log(1 + \frac{x}{\alpha} + \frac{x^2}{2\alpha^2})$ . We have  $\phi_\alpha^{\prime(2)}(x) = \frac{1+\frac{x}{\alpha}}{1+\frac{x}{\alpha}+\frac{x^2}{2\alpha^2}} = 1 - \frac{1}{1+2\alpha/x+2\alpha^2/x^2}$ . Then it is easy to check it satisfies condition (ii), (iii), and for any  $\alpha_1 \leq \alpha_2$ , we have  $\phi_{\alpha_1}'(x) \leq \phi_{\alpha_2}'(x)$ . Since  $\phi_\alpha^{\prime\prime(2)}(x) = -\frac{1}{\alpha} \frac{\frac{x}{\alpha} + \frac{x^2}{2\alpha^2}}{(1+\frac{x}{\alpha}+\frac{x^2}{2\alpha^2})^2}$ , then  $|\phi_\alpha^{\prime\prime(2)}(x)| \leq 1/\alpha$ , indicating that it satisfies condition (i).

**Example 3.**

$$\phi_\alpha^h(x) = \begin{cases} \frac{\alpha}{3} [1 - (1 - \frac{x}{\alpha})^3] & \text{if } 0 \leq x < \alpha, \\ 0 & \text{otherwise.} \end{cases}$$

Then we have

$$\phi_\alpha^{\prime h}(x) = \begin{cases} (1 - \frac{x}{\alpha})^2 & \text{if } 0 \leq x < \alpha, \\ 0 & \text{otherwise.} \end{cases}$$

Then it is easy to check it satisfies condition (ii), (iii), and for any  $\alpha_1 \leq \alpha_2$ , we have  $\phi_{\alpha_1}'(x) \leq \phi_{\alpha_2}'(x)$ . Since

$$\phi_\alpha^{\prime\prime h}(x) = \begin{cases} -\frac{2}{\alpha}(1 - \frac{x}{\alpha}) & \text{if } 0 \leq x < \alpha, \\ 0 & \text{otherwise.} \end{cases}$$

then  $|\phi_\alpha^{\prime\prime h}(x)| \leq 2/\alpha$ , indicating that it satisfies condition (i).

Next, we will verify the conditions  $|x - \phi_\alpha^{(1)}(x)| \leq \frac{Mx^2}{\alpha}$ ,  $|x - \phi_\alpha^{(2)}(x)| \leq \frac{Mx^2}{\alpha}$ , and  $|x - \phi_\alpha^h(x)| \leq \frac{Mx^2}{\alpha}$ .

**Proposition 1.** For any  $\alpha > 0$  and  $x \geq 0$ , we have

$$|x - \phi_\alpha^{(1)}(x)| \leq \frac{x^2}{2\alpha} \text{ and } |x - \phi_\alpha^{(2)}(x)| \leq \frac{x^2}{2\alpha}. \quad (1)$$

*Proof.* We first need the following result to prove the proposition:

$$\exp(y) \geq 1 + y + \frac{y^2}{2} \text{ for all } y \geq 0. \quad (2)$$

Let's first consider  $\phi_\alpha^{(1)}(x)$ , to prove  $|x - \alpha \log(1 + x/\alpha)| \leq \frac{1}{2\alpha}x^2$ , we have to show  $|x/\alpha - \log(1 + x/\alpha)| \leq \frac{1}{2\alpha^2}x^2$ . Let  $y = x/\alpha \geq 0$ , we only need to show  $|y - \log(1 + y)| \leq \frac{y^2}{2}$ . By the inequality (2) we know that  $\log(1 + y) - y \leq 0$ , so we only need to show  $f(y) := y - \log(1 + y) - \frac{y^2}{2} \leq 0$  for all  $y \geq 0$ . Since  $f'(y) = -\frac{y^2}{1+y} \leq 0$ , then we know  $f(y)$  is a decreasing function on  $y \geq 0$  thus  $f(y) \leq f(0) = 0$ , which give the first inequality in (3).

Next let's consider  $\phi_\alpha^{(2)}(x)$ . Similarly, we only need to show  $f(y) := y - \log(1 + y + y^2/2) - \frac{y^2}{2} \leq 0$  for all  $y \geq 0$ . Since  $f'(y) = -\frac{y+y^2/2+y^3/2}{1+y+y^2/2} \leq 0$ , then we know  $f(y)$  is a decreasing function on  $y \geq 0$  thus  $f(y) \leq f(0) = 0$ , which gives the second inequality in (3).  $\square$

**Proposition 2.** For any  $\alpha > 0$  and  $x \geq 0$ , we have

$$|x - \phi_\alpha^h(x)| \leq \frac{x^2}{\alpha}, \quad (3)$$

*Proof.* Let first consider  $0 \leq x < \alpha$ , then we want to show  $|x - \frac{\alpha}{3}[1 - (1 - \frac{x}{\alpha})^3]| \leq \frac{Mx^2}{\alpha}$ , or equivalently  $|\frac{x}{\alpha} - \frac{1}{3}[1 - (1 - \frac{x}{\alpha})^3]| \leq \frac{Mx^2}{\alpha^2}$ . Let  $y = \frac{x}{\alpha} \in [0, 1)$ , we only need to show  $|y - \frac{1}{3}[1 - (1 - y)^3]| \leq My^2$ .

(i) When  $y - \frac{1}{3}[1 - (1 - y)^3] > 0$ , then we need to show  $f(y) := y - \frac{1}{3}[1 - (1 - y)^3] - My^2 \leq 0$ . In fact,  $f'(y) = 1 - (1 - y)^2 - 2My = 2(1 - M)y - y^2$ , By setting  $M \geq 1$ , we know  $f'(y) < 0$ . Therefore,  $f(y) \leq f(0) = 0$  for all  $0 \leq y < 1$ .

(ii) When  $y - \frac{1}{3}[1 - (1 - y)^3] \leq 0$ , then we need to show  $f(y) := \frac{1}{3}[1 - (1 - y)^3] - y - My^2 \leq 0$ . In fact,  $f'(y) = (1 - y)^2 - 1 - 2My = -(1 + 2M)y - (1 - y)y < 0$ , then  $f(y) \leq f(0) = 0$  for all  $0 \leq y < 1$ .

Next we consider  $x \geq \alpha$ , then we want to show  $|x - \frac{\alpha}{3}| \leq \frac{Mx^2}{\alpha}$ , or equivalently  $|\frac{x}{\alpha} - \frac{1}{3}| \leq \frac{Mx^2}{\alpha^2}$ . Let  $y = \frac{x}{\alpha} \geq 1$ , we only need to show  $|y - \frac{1}{3}| \leq My^2$ . Since  $y > 1$ , we must show  $y - \frac{1}{3} \leq My^2$ . By setting  $M \geq 1$ , this trivially holds. In summary, we can choose  $M = 1$ , which completes the proof.  $\square$

## B Proof of Theorem 2

We will use the following lemma to prove this theorem. The proof of this lemma can be found in subsection B.1.

**Lemma 1.** *Under the same setting as Theorem 2, with a probability at least  $1 - 3\delta$ , we have*

$$\sup_{f \in \mathcal{F}} |\Lambda(f) - \Lambda(f^*)| \leq C\beta(\mathcal{F}, \alpha) \log(2/\delta) \left( \frac{\gamma_2(\mathcal{F}, d_e)}{\sqrt{n}} + \frac{\gamma_1(\mathcal{F}, d_m)}{n} \right),$$

where  $\Lambda(f) = P(\phi_\alpha(f)) - P_n(\phi_\alpha(f))$ ,  $C$  is a universal constant.

*Proof of Theorem 2.* By (6), we know  $\hat{f} = \arg \min_{f \in \mathcal{F}} P_n(\phi_\alpha(f))$ , and thus  $P_n(\phi_\alpha(\hat{f})) - P_n(\phi_\alpha(f^*)) \leq 0$ , where  $f^* = \arg \min_{f \in \mathcal{F}} P(f)$ . Then we have

$$\begin{aligned} P(\hat{f}) - P(f^*) &= [P(\hat{f}) - P(\phi_\alpha(\hat{f}))] + [P(\phi_\alpha(\hat{f})) - P_n(\phi_\alpha(\hat{f}))] + [P_n(\phi_\alpha(\hat{f})) - P_n(\phi_\alpha(f^*))] \\ &\quad + [P_n(\phi_\alpha(f^*)) - P(\phi_\alpha(f^*))] + [P(\phi_\alpha(f^*)) - P(f^*)] \\ &\leq [P(\hat{f}) - P(\phi_\alpha(\hat{f}))] + [P(\phi_\alpha(\hat{f})) - P_n(\phi_\alpha(\hat{f}))] + [P_n(\phi_\alpha(f^*)) - P(\phi_\alpha(f^*))] \\ &\quad + [P(\phi_\alpha(f^*)) - P(f^*)] \\ &\leq [P(\phi_\alpha(\hat{f})) - P_n(\phi_\alpha(\hat{f}))] + [P_n(\phi_\alpha(f^*)) - P(\phi_\alpha(f^*))] + \frac{2M\sigma^2}{\alpha}. \end{aligned}$$

where the last inequality is derived using the fact that  $\mathbb{E}[|X - \phi_\alpha(X)|] \leq \mathbb{E}[\frac{M}{\alpha}X^2]$  for a random variable  $X$ . Then by Lemma 1, with a probability at least  $1 - 3\delta$ ,

$$P(\hat{f}) - P(f^*) \leq C\beta(\mathcal{F}, \alpha) \log(2/\delta) \left( \frac{\gamma_2(\mathcal{F}, d_e)}{\sqrt{n}} + \frac{\gamma_1(\mathcal{F}, d_m)}{n} \right) + \frac{2M\sigma^2}{\alpha}.$$

$\square$

### B.1 Proof of Lemma 1

*Proof.* This proof is similar to the analysis in Proposition 5 and Lemma 6 from [1]. For completeness, we include it here. For any  $f, f' \in \mathcal{F}$ , we first know that  $n(\Lambda(f) - \Lambda(f'))$  is the summation of the following independent random variables with zero mean:

$$C_i(f, f') = \phi_\alpha(f(Z_i)) - \phi_\alpha(f'(Z_i)) - [\mathbb{E}[\phi_\alpha(f(Z))] - \mathbb{E}[\phi_\alpha(f'(Z))]] \leq 2\beta(\mathcal{F}, \alpha)d_m(f, f'),$$

where the last inequality is due to  $\phi_\alpha$  is Lipschitz continuous and  $\beta(\mathcal{F}, \alpha) = \sup_{f, Z} \phi'_\alpha(f(Z))$ . On the other hand,

$$\sum_{i=1}^n \mathbb{E}[C_i(f, f')^2] \leq \sum_{i=1}^n \mathbb{E}[(\phi_\alpha(f(Z_i)) - \phi_\alpha(f'(Z_i)))^2] \leq n\beta^2(\mathcal{F}, \alpha)d_e^2(f, f').$$

Then by using Bernstein's inequality we have for any  $f, f' \in \mathcal{F}$  and  $\theta > 0$ ,

$$\Pr(|\Lambda(f) - \Lambda(f')| > \theta) \leq 2 \exp\left(-\frac{n\theta^2}{2(\beta^2(\mathcal{F}, \alpha)d_e^2(f, f') + \theta\beta(\mathcal{F}, \alpha)d_m(f, f')/3)}\right).$$

Then by using Theorem 12 and inequality (14) from [1], let  $f' = f^*$  we get

$$\sup_{f \in \mathcal{F}} |\Lambda(f) - \Lambda(f^*)| \leq C\beta(\mathcal{F}, \alpha) \log(2/\delta) \left( \frac{\gamma_2(\mathcal{F}, d_e)}{\sqrt{n}} + \frac{\gamma_1(\mathcal{F}, d_m)}{n} \right),$$

where  $C$  is a constant. □

### C Proof of Corollary 3

*Proof.* By assumption we know that there exists a constant  $D > 0$  such that  $\max_{X \in \mathcal{X}, h, h' \in \mathcal{H}} |h(X) - h'(X)| \leq D$ . Then for any  $X \in \mathcal{X}$ , by the Lipschitz continuity of  $\ell$  function, we know that

$$|\ell(h(X), Y) - \ell(h'(X), Y)| \leq L|h(X) - h'(X)| \leq LD.$$

where  $L$  is the Lipschitz constant of  $\ell(\cdot)$  with respect to its first argument. By the definition of  $\mathcal{H}$ , Since for any  $f, f' \in \mathcal{F}$ , we have  $d_m(f, f') \leq Ld_m(h, h')$ , where  $f = \ell(h(\cdot), \cdot)$  and  $f' = \ell(h'(\cdot), \cdot)$ . Hence an  $\epsilon/L$ -cover of  $\mathcal{H}$  under the metric  $d_m$  induces an  $\epsilon$ -cover of  $\mathcal{F}$  under the metric  $d_m$ . Therefore, we have

$$\log N(\mathcal{F}, \epsilon, d_m) \leq \log N(\mathcal{H}, \epsilon/L, d_m).$$

Since  $\mathcal{H}$  is a compact set under distance measure  $d_m$  by the assumption, its covering number is finite [2]. Then

$$\gamma_1(\mathcal{F}, d_m) \leq \int_0^1 \log N(\mathcal{F}, \epsilon, d_m) d\epsilon \leq \int_0^1 \log N(\mathcal{H}, \epsilon/L, d_m) d\epsilon < \infty.$$

Similarly,

$$\begin{aligned} \gamma_2(\mathcal{F}, d_e) &\leq \int_0^1 \log N(\mathcal{F}, \epsilon, d_e)^{1/2} d\epsilon \leq \int_0^1 \log N(\mathcal{F}, \epsilon, d_m)^{1/2} d\epsilon \leq \int_0^1 \log N(\mathcal{H}, \epsilon/L, d_m)^{1/2} d\epsilon \\ &\leq \infty \end{aligned}$$

By setting  $\alpha \geq \Omega(\sqrt{n})$  in Theorem 2, we get the result. □

### D Proof of Theorem 4

We will use the following lemma to prove this theorem. The proof of this lemma can be found in subsection D.1.

**Lemma 2.** *Under the same setting as Theorem 4, with a probability at least  $1 - 3\delta$ , we have*

$$\sup_{f \in \mathcal{F}} |\Lambda(f) - \Lambda(f^*)| \leq C\beta(\mathcal{F}, \alpha) \max(\Gamma_\delta, \Delta(\mathcal{F}, d_e)) \sqrt{\frac{\log(\frac{8}{\delta})}{n}},$$

where  $\Lambda(f) = P(\phi_\alpha(f)) - P_n(\phi_\alpha(f))$ ,  $C$  is a universal constant.

*Proof of Theorem 4.* Similar to the proof of Theorem 2, we have

$$P(\hat{f}) - P(f^*) \leq [P(\phi_\alpha(\hat{f})) - P_n(\phi_\alpha(\hat{f}))] + [P_n(\phi_\alpha(f^*)) - P(\phi_\alpha(f^*))] + \frac{2M\sigma^2}{\alpha}.$$

Then by Lemma 2, with a probability at least  $1 - 3\delta$ ,

$$P(\hat{f}) - P(f^*) \leq C\beta(\mathcal{F}, \alpha) \max(\Gamma_\delta, \Delta(\mathcal{F}, d_e)) \sqrt{\frac{\log(\frac{8}{\delta})}{n}} + \frac{2M\sigma^2}{\alpha}.$$

Then by setting  $\alpha \geq \sqrt{n\sigma^2/(2\log(1/\delta))}$ , we get

$$P(\hat{f}) - P(f^*) \leq O\left(\max(\Gamma_\delta, \Delta(\mathcal{F}, d_e))\sqrt{\frac{\log(8/\delta)}{n}}\right).$$

□

### D.1 Proof of Lemma 2

*Proof.* This proof is similar to the analysis in Theorem 7 from [1]. For completeness, we include it here. First, we assume  $\Gamma_\delta \geq \Delta(\mathcal{F}, d_e)$ . Let  $(Z'_1, \dots, Z'_n)$  be an independent copies of  $(Z_1, \dots, Z_n)$ , and we define

$$W_i(f) = \frac{1}{n}\phi_\alpha(f(Z_i)) - \frac{1}{n}\phi_\alpha(f(Z'_i)).$$

For any  $f \in \mathcal{F}$ , we define

$$W(f) = \sum_{i=1}^n \varepsilon_i W_i(f),$$

where  $\varepsilon_1, \dots, \varepsilon_n$  are independent Rademacher random variables. Based on Hoeffding's inequality, we have for all  $f, g \in \mathcal{F}$  and any  $\theta > 0$ ,

$$\Pr(|W(f) - W(g)| > \theta) \leq 2 \exp\left(-\frac{\theta^2}{2d_{s,s'}(f, g)}\right),$$

where the probability is taken over Rademacher variables conditional on  $Z_i$  and  $Z'_i$ , and  $d_{s,s'}(f, g) = \sqrt{\sum_{i=1}^n (W_i(f) - W_i(g))^2}$ . Then by using Proposition 14 of [1], we have for all  $\lambda > 0$ , and a universal constant  $C$

$$\mathbb{E} \left[ \exp \left( \lambda \sup_{f \in \mathcal{F}} |W(f) - W(f^*)| \right) \right] \leq 2 \exp(\lambda^2 C^2 \gamma(\mathcal{F}, d_{s,s'}(f, f^*))^2 / 4), \quad (4)$$

By the definition of  $d_{s,s'}(f, g)$ , we have

$$\begin{aligned} d_{s,s'}(f, g) &= \sqrt{\sum_{i=1}^n (W_i(f) - W_i(g))^2} \\ &= \left( \frac{1}{n^2} \sum_{i=1}^n [\phi_\alpha(f(Z_i)) - \phi_\alpha(f(Z'_i)) - (\phi_\alpha(g(Z_i)) - \phi_\alpha(g(Z'_i)))]^2 \right)^{\frac{1}{2}} \\ &\leq \frac{1}{n} \left( \sum_{i=1}^n [\phi_\alpha(f(Z_i)) - \phi_\alpha(g(Z_i))]^2 \right)^{\frac{1}{2}} + \frac{1}{n} \left( \sum_{i=1}^n [\phi_\alpha(f(Z'_i)) - \phi_\alpha(g(Z'_i))]^2 \right)^{\frac{1}{2}} \\ &\leq \frac{1}{\sqrt{n}} \beta(\mathcal{F}, \alpha) \left( \frac{1}{n} \sum_{i=1}^n [f(Z_i) - g(Z_i)]^2 \right)^{\frac{1}{2}} + \frac{1}{\sqrt{n}} \beta(\mathcal{F}, \alpha) \left( \frac{1}{n} \sum_{i=1}^n [f(Z'_i) - g(Z'_i)]^2 \right)^{\frac{1}{2}}, \end{aligned}$$

where the second inequality uses the fact that  $\phi_\alpha(x)$  is Lipschitz continuous. Thus, we have

$$\gamma(\mathcal{F}, d_{s,s'}(f, g)) \leq \frac{1}{\sqrt{n}} \beta(\mathcal{F}, \alpha) \gamma(\mathcal{F}, d_s(f, g)) + \frac{1}{\sqrt{n}} \beta(\mathcal{F}, \alpha) \gamma(\mathcal{F}, d_{s'}(f, g)). \quad (5)$$

Then we have

$$\begin{aligned}
& \Pr \left( \sup_{f \in \mathcal{F}} |W(f) - W(f^*)| \geq \theta \right) \\
& \leq \Pr \left( \sup_{f \in \mathcal{F}} |W(f) - W(f^*)| \geq \theta \mid \gamma(\mathcal{F}, d_s) \leq \Gamma_\delta \text{ and } \gamma(\mathcal{F}, d_{s'}) \leq \Gamma_\delta \right) + 2\Pr(\gamma(\mathcal{F}, d_s) > \Gamma_\delta) \\
& \leq \mathbb{E} \left[ \exp \left( \lambda \sup_{f \in \mathcal{F}} |W(f) - W(f^*)| \right) \mid \gamma(\mathcal{F}, d_s) \leq \Gamma_\delta \text{ and } \gamma(\mathcal{F}, d_{s'}) \leq \Gamma_\delta \right] \exp(-\lambda\theta) + 2\Pr(\gamma(\mathcal{F}, d_s) > \Gamma_\delta) \\
& \leq 2 \exp(\lambda^2 C^2 \Gamma_\delta^2 / n) \exp(-\lambda\theta) + 2\Pr(\gamma(\mathcal{F}, d_s) > \Gamma_\delta) \\
& \leq 2 \exp \left( \frac{\lambda^2 C^2 \Gamma_\delta^2}{n} - \lambda\theta \right) + \frac{\delta}{4}
\end{aligned}$$

where the second inequality uses Markov inequality, the third inequality uses the results of (4) and (5), where the last inequality is due to the definition of  $\Gamma_\delta$  which satisfies  $\Pr(\gamma(\mathcal{F}, d_s) > \Gamma_\delta) \leq \delta/8$ .

Let  $\theta = 2C\Gamma_\delta \sqrt{\frac{\log(8/\delta)}{n}}$  and  $\lambda = \frac{\sqrt{n \log(8/\delta)}}{C\Gamma_\delta}$  then

$$\frac{\lambda^2 C^2 \Gamma_\delta^2}{n} - \lambda\theta = \frac{\lambda^2 C^2 \Gamma_\delta^2}{n} - 2C\Gamma_\delta \sqrt{\frac{\log(8/\delta)}{n}} \lambda = -\log(8/\delta).$$

Therefore,

$$\Pr \left( \sup_{f \in \mathcal{F}} |W(f) - W(f^*)| \geq \theta \right) \leq \frac{\delta}{4} + \frac{\delta}{4} = \frac{\delta}{2}$$

By Lemma 3.3 from [4], we get

$$\Pr \left( \sup_{f \in \mathcal{F}} |\Lambda(f) - \Lambda(f^*)| \geq 2\theta \right) \leq 2\Pr \left( \sup_{f \in \mathcal{F}} |W(f) - W(f^*)| \geq \theta \right) \leq \delta$$

and for any  $f \in \mathcal{F}$ ,  $\Pr(\sup_{f \in \mathcal{F}} |\Lambda(f) - \Lambda(f^*)| \geq \theta) \leq \frac{1}{2}$ . On the other hand, by using  $\mathbb{E}[\Lambda(f) - \Lambda(f^*)] = 0$  and Lipschitz continuous of  $\phi_\alpha(x)$ , we have

$$\frac{\text{Var}(\Lambda(f) - \Lambda(f^*))}{\theta^2} \leq \beta^2(\mathcal{F}, \alpha) \frac{\mathbb{E}[f(Z) - f^*(Z)]^2}{n\theta^2} \leq \beta^2(\mathcal{F}, \alpha) \frac{\Delta^2(\mathcal{F}, d_e)}{n\theta^2}.$$

By applying Chebyshev's inequality, it suffices to get

$$\theta \geq \sqrt{2/n} \beta(\mathcal{F}, \alpha) \Delta(\mathcal{F}, d_e).$$

If we assume  $C > 1$  and choose  $\delta < 1/3$ , then  $C\beta(\mathcal{F}, \alpha)\Gamma_\delta \sqrt{\frac{\log(8/\delta)}{n}} \geq \sqrt{2/n} \beta(\mathcal{F}, \alpha) \Delta^2(\mathcal{F}, d_e)$ . Therefore, we get

$$\Pr \left( \sup_{f \in \mathcal{F}} |\Lambda(f) - \Lambda(f^*)| \geq 2C\beta(\mathcal{F}, \alpha)\Gamma_\delta \sqrt{\frac{\log(8/\delta)}{n}} \right) \leq \delta$$

We can get the similar result for  $\Gamma_\delta < \Delta(\mathcal{F}, d_e)$  instead of  $\Gamma_\delta$  by using the similar analysis. We then complete the proof.  $\square$

## E Proof of Proposition 1

*Proof.* Let define  $z_i = \mathbf{w}^\top \mathbf{x}_i - y_i$ , then  $\nabla F_\alpha(\mathbf{w}) = \frac{1}{n} \sum_{i=1}^n \nabla_{\mathbf{w}}(\phi_\alpha(z_i^2/2)) = \frac{1}{n} \sum_{i=1}^n \phi'_\alpha(z_i^2/2) z_i \mathbf{x}_i$  and  $\nabla^2 F_\alpha(\mathbf{w}) = \frac{1}{n} \sum_{i=1}^n \nabla_{\mathbf{w}}(\phi'_\alpha(z_i^2/2) z_i \mathbf{x}_i) = \frac{1}{n} \sum_{i=1}^n \phi''_\alpha(z_i^2/2) z_i^2 \mathbf{x}_i \mathbf{x}_i^\top + \phi'_\alpha(z_i^2/2) \mathbf{x}_i \mathbf{x}_i^\top$ . By the assumptions,

there exists a constant  $\kappa > 0$ , such that  $\|\nabla^2 F_\alpha(\mathbf{w})\| \leq (\kappa + 1)R^2$ , indicating that  $F_\alpha(\mathbf{w})$  has a  $(\kappa + 1)R^2$ -Lipschitz continuous gradient. Then we have

$$\begin{aligned} F_\alpha(\mathbf{w}_{t+1}) &\leq F_\alpha(\mathbf{w}_t) + \nabla F_\alpha(\mathbf{w}_t)^\top (\mathbf{w}_{t+1} - \mathbf{w}_t) + \frac{(\kappa + 1)R^2}{2} \|\mathbf{w}_{t+1} - \mathbf{w}_t\|^2 \\ &= F_\alpha(\mathbf{w}_t) - \eta_t \nabla F_\alpha(\mathbf{w}_t)^\top \phi_\alpha((\mathbf{w}_t^\top \mathbf{x}_i - y_i)^2) + \frac{(\kappa + 1)R^2 \eta_t^2}{2} \|\phi_\alpha((\mathbf{w}_t^\top \mathbf{x}_i - y_i)^2)\|^2 \\ &= F_\alpha(\mathbf{w}_t) - \eta_t \nabla F_\alpha(\mathbf{w}_t)^\top \phi_\alpha((\mathbf{w}_t^\top \mathbf{x}_i - y_i)^2) \\ &\quad + \frac{(\kappa + 1)R^2 \eta_t^2}{2} \|\nabla \phi_\alpha((\mathbf{w}_t^\top \mathbf{x}_i - y_i)^2) - \nabla F_\alpha(\mathbf{w}_t) + \nabla F_\alpha(\mathbf{w}_t)\|^2 \end{aligned}$$

Taking expectation on both sides we have

$$\begin{aligned} \mathbb{E}[F_\alpha(\mathbf{w}_{t+1}) - F_\alpha(\mathbf{w}_t)] &\leq \frac{(\kappa + 1)R^2 \eta_t^2 - 2\eta_t}{2} \mathbb{E}[\|\nabla F_\alpha(\mathbf{w}_t)\|^2] + \frac{(\kappa + 1)R^2 \eta_t^2 \sigma_\alpha}{2} \\ &\leq -\frac{\eta_t}{2} \mathbb{E}[\|\nabla F_\alpha(\mathbf{w}_t)\|^2] + \frac{(\kappa + 1)R^2 \eta_t^2 \sigma_\alpha}{2}, \end{aligned}$$

where the last inequality uses the fact that  $\eta_t \leq \frac{1}{(\kappa+1)L^2}$ . Summing up  $t$  over  $1, \dots, T$ , we have

$$\sum_{t=1}^T \eta_t \mathbb{E}[\|\nabla F_\alpha(\mathbf{w}_t)\|^2] \leq 2(F_\alpha(\mathbf{w}_1) - F_\alpha(\mathbf{w}_*)) + \sum_{t=1}^T (\kappa + 1)R^2 \eta_t^2 \sigma_\alpha. \quad (6)$$

By setting  $\eta_t = \frac{1}{(\kappa+1)R^2 \sqrt{T}}$ , we have

$$\mathbb{E}_R[\mathbb{E}[\|\nabla F_\alpha(\mathbf{w}_t)\|^2]] \leq \frac{2(\kappa + 1)R^2(F_\alpha(\mathbf{w}_1) - F_\alpha(\mathbf{w}_*))}{\sqrt{T}} + \frac{\sigma_\alpha}{\sqrt{T}}, \quad (7)$$

where  $R$  is a uniform random variable supported on  $\{1, \dots, T\}$ . To achieve an approximate stationary point  $\mathbb{E}[\|\nabla F_\alpha(\mathbf{w}_t)\|^2] \leq \epsilon^2$ , the iteration complexity is  $T = O(\sigma_\alpha^2/\epsilon^4)$ .  $\square$

**Remark.** The condition of  $|x^2 \phi_\alpha''(x^2/2)| \leq \kappa$  for three different truncation functions presented in Preliminaries subsection can be easily checked. Example 1:  $|x^2 \phi_\alpha^{(1)''}(x^2/2)| = \left| -\frac{x^2/\alpha}{(1+x^2/(2\alpha))^2} \right| = \frac{x^2/\alpha}{1+x^2/\alpha+x^4/(2\alpha)^4} \leq 1$ ; Example 2:  $|x^2 \phi_\alpha^{(2)''}(x^2/2)| = \left| \frac{x^4/(2\alpha^2)+x^6/(8\alpha^3)}{(1+x^2/(2\alpha)+x^4/(8\alpha^2))^2} \right| = \frac{x^4/(2\alpha^2)+x^6/(8\alpha^3)}{1+x^2/\alpha+x^4/(2\alpha^2)+x^6/(8\alpha^3)+x^8/(64\alpha^4)} \leq 1$ ; Example 3:  $|x^2 \phi_\alpha^{(h)''}(x^2/2)| = \left| \frac{2x^2(1-x^2/(2\alpha))}{\alpha} \right| = \frac{(2\alpha-x^2)x^2}{\alpha^2} \leq 1$  when  $0 \leq x^2/2 \leq \alpha$ , otherwise  $|x^2 \phi_\alpha^{(h)''}(x^2/2)| = 0$ .

## F Proof of Theorem 5

*Proof.* We will use the following lemma in our proof.

**Lemma 3.** [5] Under the assumption of Theorem 5, the following inequality holds for any  $\mathbf{w}_1, \mathbf{w}_2 \in \{\mathbf{w} : \|\mathbf{w} - \mathbf{w}_*\|_2 \leq r\}$  with probability  $1 - c \exp(c' \log d)$ ,

$$(\nabla F_\alpha(\mathbf{w}_1) - \nabla F_\alpha(\mathbf{w}_2))^\top (\mathbf{w}_1 - \mathbf{w}_2) \geq \frac{\alpha_T \lambda_{\min}(\Sigma_x)}{16} \|\mathbf{w}_1 - \mathbf{w}_2\|_2^2 - \tau \frac{\log(d)}{n} \|\mathbf{w}_1 - \mathbf{w}_2\|_1^2, \quad (8)$$

where  $\alpha_T := \min_{|u| \leq T} \ell''(u) > 0$ ,  $\tau = \frac{C(\alpha_T + \kappa_2)^2 \sigma_x^2 T^2}{r^2}$ , and  $\kappa_2$  satisfies  $\ell''(u) \geq -\kappa_2$  for all  $u$ .

Then let's start our proof by setting  $\ell(u) := \phi_\alpha(u^2/2) = \alpha \log(1 + u^2/(2\alpha))$ . It is easy to show that  $|\ell'(u)| = \left| \frac{u}{1+u^2/(2\alpha)} \right| \leq \frac{\sqrt{2\alpha}}{2}$  and  $\phi_\alpha''(u) = \frac{1-u^2/(2\alpha)}{(1+u^2/(2\alpha))^2} \geq -\frac{1}{8}$ , then  $\kappa_2 = \frac{1}{8}$ . Let  $T \leq \sqrt{2\alpha}/2$ , then  $\alpha_T = \frac{12}{25}$ . Then

$$(\nabla F_\alpha(\mathbf{w}_\alpha) - \nabla F_\alpha(\mathbf{w}_*))^\top (\mathbf{w}_\alpha - \mathbf{w}_*) \geq a \|\mathbf{w}_\alpha - \mathbf{w}_*\|_2^2 - \tau \frac{\log(d)}{n} \|\mathbf{w}_\alpha - \mathbf{w}_*\|_1^2, \quad (9)$$

where  $a = \frac{3\lambda_{\min}(\Sigma_x)}{100}$  and  $\tau = \frac{C\sigma_x^2 T^2}{r^2}$  and  $C$  is a constant. Suppose SGD returns an approximate stationary point  $\mathbf{w}_\alpha$  such that  $\|\mathbf{w}_\alpha - \mathbf{w}_*\|_2 \leq r$  and  $\|\nabla F_\alpha(\mathbf{w}_\alpha)\|_2 \leq \epsilon$ . Since  $\mathbf{w}_\alpha$  is a stationary point and  $\mathbf{w}_*$  is feasible, we have

$$\nabla F_\alpha(\mathbf{w}_\alpha)^\top (\mathbf{w}_* - \mathbf{w}_\alpha) \geq -\epsilon \|\mathbf{w}_* - \mathbf{w}_\alpha\|_2 \quad (10)$$

By Proposition 1 of [5], we have

$$\nabla F_\alpha(\mathbf{w}_*)^\top (\mathbf{w}_\alpha - \mathbf{w}_*) \geq -c \frac{\sqrt{2\alpha}}{2} \sigma_x \sqrt{\log(d)/n} \|\mathbf{w}_\alpha - \mathbf{w}_*\|_1 \quad (11)$$

Combining inequalities (9) (10) and (11), we have

$$\begin{aligned} a \|\mathbf{w}_\alpha - \mathbf{w}_*\|_2^2 &\leq \epsilon \|\mathbf{w}_* - \mathbf{w}_\alpha\|_2 + c \frac{\sqrt{2\alpha}}{2} \sigma_x \sqrt{\log(d)/n} \|\mathbf{w}_\alpha - \mathbf{w}_*\|_1 + \tau \frac{\log(d)}{n} \|\mathbf{w}_\alpha - \mathbf{w}_*\|_1^2 \\ &\leq \epsilon \|\mathbf{w}_* - \mathbf{w}_\alpha\|_2 + c \frac{\sqrt{2\alpha}}{2} \sigma_x \sqrt{d \log(d)/n} \|\mathbf{w}_\alpha - \mathbf{w}_*\|_2 + \tau \frac{d \log(d)}{n} \|\mathbf{w}_\alpha - \mathbf{w}_*\|_2^2 \\ &\leq \epsilon \|\mathbf{w}_* - \mathbf{w}_\alpha\|_2 + c \frac{\sqrt{2\alpha}}{2} \sigma_x \sqrt{d \log(d)/n} \|\mathbf{w}_\alpha - \mathbf{w}_*\|_2 + \tau r \frac{d \log(d)}{n} \|\mathbf{w}_\alpha - \mathbf{w}_*\|_2 \end{aligned}$$

Then we get

$$\|\mathbf{w}_\alpha - \mathbf{w}_*\|_2 \leq O \left( \sqrt{\frac{\alpha d \log d}{n}} + \frac{T^2 d \log d}{rn} + \epsilon \right)$$

□

## G Proof of Proposition 2

*Proof.* For similitude, let  $\ell(\mathbf{w}) = \ell(\mathbf{w}; \mathbf{x}, \mathbf{y})$ . By the definition of truncation function, we know that  $\phi_\alpha(x)$  is smooth, i.e., for any  $\mathbf{w}, \mathbf{v} \in \mathbb{R}^d$ , there exists a constant  $L_\alpha$  such that  $\phi_\alpha(\ell(\mathbf{v})) + \phi'_\alpha(\ell(\mathbf{v}))(\ell(\mathbf{w}) - \ell(\mathbf{v})) - \frac{L_\alpha}{2} |\ell(\mathbf{w}) - \ell(\mathbf{v})|^2 \leq \phi_\alpha(\ell(\mathbf{w}))$ . Since  $\ell$  is convex, i.e. for any  $\mathbf{w}, \mathbf{v} \in \mathbb{R}^d$ ,  $\ell(\mathbf{w}) \geq \ell(\mathbf{v}) + \partial \ell(\mathbf{v})^\top (\mathbf{w} - \mathbf{v})$ , then

$$\begin{aligned} \phi_\alpha(\ell(\mathbf{w})) - \phi_\alpha(\ell(\mathbf{v})) &\geq \phi'_\alpha(\ell(\mathbf{v})) \partial \ell(\mathbf{v})^\top (\mathbf{w} - \mathbf{v}) - \frac{L_\alpha}{2} |\ell(\mathbf{w}) - \ell(\mathbf{v})|^2 \\ &\geq \phi'_\alpha(\ell(\mathbf{v})) \partial \ell(\mathbf{v})^\top (\mathbf{w} - \mathbf{v}) - \frac{G^2 L_\alpha}{2} \|\mathbf{w} - \mathbf{v}\|^2 \end{aligned}$$

where the first inequality uses  $\phi'_\alpha(\ell(\mathbf{v})) \geq 0$ ; the second inequality uses the fact that  $\|\partial \ell(\mathbf{w}; \mathbf{x}_i, y_i)\| \leq G$ . That is,  $F_\alpha(\mathbf{w})$  is  $G^2 L_\alpha$ -weakly convex. Finally, by employing the result of Theorem 2.1 from [3], we can complete the proof. □

## References

- [1] C. Brownlees, E. Joly, and G. Lugosi. Empirical risk minimization for heavy-tailed losses. *The Annals of Statistics*, 43(6):2507–2536, 2015.
- [2] F. Cucker and S. Smale. On the mathematical foundations of learning. *Bulletin of the American mathematical society*, 39(1):1–49, 2002.
- [3] D. Davis and D. Drusvyatskiy. Stochastic model-based minimization of weakly convex functions. *SIAM Journal on Optimization*, 29(1):207–239, 2019.
- [4] S. A. Geer. *Applications of empirical process theory*. Cambridge University Press, 2000.
- [5] P.-L. Loh. Statistical consistency and asymptotic normality for high-dimensional robust  $m$ -estimators. *The Annals of Statistics*, 45(2):866–896, 2017.
